# Supplementary material
Source: Springer Nature journal article supplement (https://www.springermedizin.de/resource/supplementary/12889_2010_3214_MOESM1_ESM.pdf/9488312)
Supplement: MOESM1 [file 9488312]

**Additional table: Association between characteristics of male sex workers in Mombasa Kenya (n=307) and AUDIT scores, and frequency and patterns of alcohol use**

| Variable                                          | Alcohol abstainers<br>n (%) | Alcohol drinkers      |                     |                      |                      |                  |                                   |                                |              |                                 |                                |              |
|---------------------------------------------------|-----------------------------|-----------------------|---------------------|----------------------|----------------------|------------------|-----------------------------------|--------------------------------|--------------|---------------------------------|--------------------------------|--------------|
|                                                   |                             | Audit scores<br>n (%) |                     |                      |                      |                  | Frequency of alcohol use<br>n (%) |                                |              | Pattern of alcohol use<br>n (%) |                                |              |
|                                                   |                             | Audit score<br>1-7    | Audit score<br>8-15 | Audit score<br>16-19 | Audit score<br>20-40 | P                | 1 to 4<br>times per<br>month      | 2 or more<br>times per<br>week | P            | Non<br>binge<br>drinker         | Binge (≥6<br>alcohol<br>units) | P            |
| <u>Age</u> 24 years and younger                   | 79 (59)                     | 50 (56)               | 65 (61)             | 21 (45)              | 34 (52)              | 0.36             | 79 (52)                           | 91 (59)                        | 0.41         | 82 (61)                         | 88 (51)                        | 0.20         |
| <u>Education</u>                                  |                             |                       |                     |                      |                      |                  |                                   |                                |              |                                 |                                |              |
| No education or incomplete primary                | 45 (33)                     | 29 (33)               | 30 (28)             | 13 (28)              | 17 (26)              |                  | 41 (27)                           | 48 (31)                        |              | 44 (33)                         | 45 (26)                        |              |
| Primary education or incomplete secondary         | 66 (49)                     | 40 (45)               | 53 (50)             | 28 (60)              | 29 (45)              |                  | 81 (53)                           | 69 (45)                        |              | 63 (47)                         | 87 (51)                        |              |
| Secondary education or higher                     | 24 (18)                     | 20 (22)               | 23 (22)             | 6 (13)               | 19 (29)              | 0.51             | 30 (20)                           | 38 (25)                        | 0.42         | 28 (21)                         | 40 (23)                        | 0.57         |
| <u>Religion</u>                                   |                             |                       |                     |                      |                      |                  |                                   |                                |              |                                 |                                |              |
| Catholic                                          | 34 (25)                     | 17 (19)               | 28 (26)             | 9 (19)               | 25 (39)              |                  | 34 (22)                           | 45 (29)                        |              | 28 (21)                         | 51 (30)                        |              |
| Protestant                                        | 21 (16)                     | 17 (19)               | 12 (11)             | 8 (17)               | 12 (19)              |                  | 25 (16)                           | 24 (16)                        |              | 22 (16)                         | 27 (16)                        |              |
| Muslim                                            | 76 (56)                     | 49 (55)               | 56 (53)             | 26 (55)              | 25 (39)              |                  | 87 (57)                           | 69 (45)                        |              | 76 (56)                         | 80 (47)                        |              |
| Animist / no religion                             | 4 (3)                       | 6 (7)                 | 10 (9)              | 4 (9)                | 2 (3)                | 0.13             | 6 (4)                             | 16 (10)                        | 0.053        | 9 (7)                           | 13 (8)                         | 0.30         |
| <u>Lives with a male and/or female partner</u>    | 40 (30)                     | 27 (30)               | 28 (26)             | 14 (30)              | 22 (34)              | 0.89             | 46 (30)                           | 45 (29)                        | 0.97         | 36 (27)                         | 55 (32)                        | 0.60         |
| <u>Sources of income</u>                          |                             |                       |                     |                      |                      |                  |                                   |                                |              |                                 |                                |              |
| Part-time sex work                                | 76 (56)                     | 49 (55)               | 59 (56)             | 22 (47)              | 30 (46)              | 0.56             | 89 (59)                           | 71 (46)                        | 0.059        | 68 (50)                         | 92 (53)                        | 0.62         |
| <u>Years of sex work</u> 6 or more years          | 50 (38)                     | 45 (51)               | 52 (50)             | 32 (68)              | 33 (52)              | <b>0.011</b>     | 76 (51)                           | 86 (56)                        | <b>0.012</b> | 63 (47)                         | 99 (58)                        | <b>0.003</b> |
| <u>Number of clients in the past 7 days</u>       |                             |                       |                     |                      |                      |                  |                                   |                                |              |                                 |                                |              |
| 3 or more clients                                 | 43 (32)                     | 25 (28)               | 38 (36)             | 15 (32)              | 23 (36)              | 0.77             | 36 (24)                           | 65 (42)                        | <b>0.002</b> | 42 (31)                         | 59 (35)                        | 0.78         |
| <u>Role during anal sex with last male client</u> |                             |                       |                     |                      |                      |                  |                                   |                                |              |                                 |                                |              |
| Insertive only                                    | 72 (54)                     | 38 (44)               | 60 (57)             | 24 (51)              | 29 (45)              |                  | 75 (50)                           | 76 (49)                        |              | 62 (47)                         | 89 (52)                        |              |
| Receptive only                                    | 55 (41)                     | 35 (41)               | 31 (29)             | 20 (43)              | 28 (43)              |                  | 57 (38)                           | 57 (37)                        |              | 48 (36)                         | 66 (38)                        |              |
| Both insertive and receptive                      | 7 (5)                       | 13 (15)               | 15 (14)             | 3 (6)                | 8 (12)               | 0.11             | 18 (12)                           | 21 (14)                        | 0.20         | 22 (17)                         | 17 (10)                        | 0.052        |
| <u>Prevention knowledge</u> <sup>‡</sup>          |                             |                       |                     |                      |                      |                  |                                   |                                |              |                                 |                                |              |
| Knows HIV can be transmitted via anal sex         | 98 (73)                     | 68 (76)               | 80 (75)             | 32 (68)              | 46 (71)              | 0.85             | 116 (76)                          | 110 (71)                       | 0.73         | 101 (75)                        | 125 (73)                       | 0.86         |
| Knows consistent condom use prevents HIV          | 121 (90)                    | 83 (93)               | 97 (92)             | 38 (81)              | 56 (86)              | 0.26             | 138 (91)                          | 136 (88)                       | 0.84         | 128 (95)                        | 146 (85)                       | <b>0.026</b> |
| <u>HIV testing</u> Ever tested for HIV            | 83 (62)                     | 64 (72)               | 66 (62)             | 30 (64)              | 40 (62)              | 0.56             | 97 (64)                           | 103 (66)                       | 0.72         | 88 (65)                         | 112 (56)                       | 0.81         |
| <u>Substance use</u> <sup>‡</sup>                 |                             |                       |                     |                      |                      |                  |                                   |                                |              |                                 |                                |              |
| Khat / Miraa                                      | 91 (67)                     | 64 (72)               | 87 (82)             | 42 (89)              | 50 (77)              | <b>0.012</b>     | 112 (74)                          | 131 (85)                       | <b>0.003</b> | 98 (73)                         | 145 (84)                       | <b>0.002</b> |
| Cocaine and/or Heroin                             | 4 (3)                       | 7 (8)                 | 11 (10)             | 5 (11)               | 7 (11)               | 0.15             | 11 (7)                            | 19 (12)                        | <b>0.012</b> | 12 (9)                          | 18 (10)                        | <b>0.041</b> |
| Rohypnol                                          | 10 (7)                      | 7 (8)                 | 19 (18)             | 11 (23)              | 19 (29)              | <b>&lt;0.001</b> | 22 (14)                           | 34 (22)                        | <b>0.002</b> | 18 (13)                         | 38 (22)                        | <b>0.001</b> |
| <u>Total cases (n)</u>                            |                             | 89                    | 106                 | 47                   | 65                   |                  | 152                               | 155                            |              | 135                             | 172                            |              |

‡ Multiple response question; men who abstain from alcohol (column 2) were included in each comparison
